# Supplementary material
Source: Springer Nature journal article supplement (https://www.springermedizin.de/resource/supplementary/13014_2013_974_MOESM5_ESM.docx/9634574)
Supplement: MOESM5 [file 9634574]

**Table 1** Demographic and tumor characteristics
